# Supplementary material
Source: publisher site journal article supplement (https://www.dovepress.com/article/297680)
Supplement: Supplementary file 1 [file get_supplementary_file.php]

# 1 Supplementary tables:

2 **Table S1. Definitions of medication and diagnostic test costs for *Helicobacter pylori* eradication therapy.**

| Cost                                   | Definition                                                                                                                                                                                                                                                                                                                                                                                                                                                                                                                                                  |
|----------------------------------------|-------------------------------------------------------------------------------------------------------------------------------------------------------------------------------------------------------------------------------------------------------------------------------------------------------------------------------------------------------------------------------------------------------------------------------------------------------------------------------------------------------------------------------------------------------------|
| <b>First-line eradication therapy</b>  |                                                                                                                                                                                                                                                                                                                                                                                                                                                                                                                                                             |
| Medication costs                       | Costs for acid-inhibitory medicines (P-CAB [vonoprazan] or PPI [esomeprazole, lansoprazole, omeprazole, or rabeprazole]) with two antibiotics (AMPC + CAM) for 7 consecutive days, or triple-drug blister packaged products for <i>H. pylori</i> first-line eradication therapy                                                                                                                                                                                                                                                                             |
| Diagnostic test costs                  | Costs for evaluating <i>H. pylori</i> infection, whichever is closer to completion of first-line medication: the month after a prescription for first-line eradication therapy and the month starting a prescription for second-line eradication therapy, or within 6 months of a prescription for first-line eradication therapy                                                                                                                                                                                                                           |
| <b>Second-line eradication therapy</b> |                                                                                                                                                                                                                                                                                                                                                                                                                                                                                                                                                             |
| Medication costs                       | Costs for acid-inhibitory medicines with AMPC and MNZ for 7 consecutive days, or triple-drug blister packaged products for <i>H. pylori</i> second-line eradication therapy prescribed in the months after first-line eradication therapy                                                                                                                                                                                                                                                                                                                   |
| Diagnostic test costs                  | Costs for evaluating <i>H. pylori</i> infection within 6 months of starting a prescription for second-line eradication therapy                                                                                                                                                                                                                                                                                                                                                                                                                              |
| <b>Medical fees</b>                    |                                                                                                                                                                                                                                                                                                                                                                                                                                                                                                                                                             |
| Subsequent visit fees                  | Uniformly added JPY 720 for subsequent visit fees across all patients in accordance with visits to medical institutes as defined below. The fees were not derived from the claims data (a 3rd subsequent visit fee was only added to patients who failed first-line eradication therapy) <ul style="list-style-type: none"> <li>• First-line eradication therapy</li> <li>• Diagnostic tests after first-line eradication therapy and starting second-line eradication therapy</li> <li>• Diagnostic tests after second-line eradication therapy</li> </ul> |

3 **Abbreviations:** AMPC, amoxicillin; CAM, clarithromycin; JPY, Japanese yen; MNZ, metronidazole; P-CAB, potassium-competitive acid blocker; PPI, proton  
4 pump inhibitor.

5 **Table S2. Definition of medications for *Helicobacter pylori* eradication therapy.**

| Classification                         |                                                                                                                                      | Definition                                                 | Health insurance codes <sup>a</sup> and/or name |
|----------------------------------------|--------------------------------------------------------------------------------------------------------------------------------------|------------------------------------------------------------|-------------------------------------------------|
| <b>First-line eradication therapy</b>  | Triple-drug blister packaged products                                                                                                | Having one of the medical action codes listed on the right | 610462048 (LANSAP <sup>®</sup> 400)             |
|                                        |                                                                                                                                      |                                                            | 610462049 (LANSAP <sup>®</sup> 800)             |
|                                        |                                                                                                                                      |                                                            | 622289101 (Rabecure <sup>®</sup> pack 400)      |
|                                        |                                                                                                                                      |                                                            | 622289201 (Rabecure <sup>®</sup> pack 800)      |
|                                        |                                                                                                                                      |                                                            | 622485401 (VONOSAP <sup>®</sup> pack 400)       |
|                                        |                                                                                                                                      |                                                            | 622485501 (VONOSAP <sup>®</sup> pack 800)       |
|                                        | P-CAB/PPI, amoxicillin, and clarithromycin prescribed in one medical practitioner's receipt for a health insurance claim per patient | P-CAB                                                      | 622404401 (Takecab <sup>®</sup> 10 mg tablet)   |
|                                        |                                                                                                                                      | PPI                                                        | 622404501 (Takecab <sup>®</sup> 20 mg tablet)   |
|                                        |                                                                                                                                      | Amoxicillin (generic name)                                 | ATC codes: A2B2 (PPIs) <sup>b</sup>             |
|                                        |                                                                                                                                      | Clarithromycin (generic name)                              | Amoxicillin hydrate                             |
|                                        |                                                                                                                                      |                                                            | Amoxicillin hydrate/potassium clavulanate       |
| <b>Second-line eradication therapy</b> | Triple-drug blister packaged products                                                                                                | Having one of the medical action codes listed on the right | Clarithromycin                                  |
|                                        |                                                                                                                                      |                                                            | 622029101 (LAMPION <sup>®</sup> pack)           |
|                                        |                                                                                                                                      |                                                            | 622289301 (Rabefine <sup>®</sup> pack)          |
|                                        | P-CAB/PPI, amoxicillin, metronidazole prescribed in 1 medical practitioner's receipt for a health insurance claim per patient        | Metronidazole (generic name)                               | 622485601 (VONOPION <sup>®</sup> pack)          |
|                                        |                                                                                                                                      |                                                            | Metronidazole                                   |

6 **Note:** <sup>a</sup>Referred to by the Medical Fee Information Service (<http://www.iryohoken.go.jp/shinryohoshu/>), LANSAP<sup>®</sup> interview form  
7 ([http://www.info.pmda.go.jp/go/pack/6199100X1025\\_1\\_29/](http://www.info.pmda.go.jp/go/pack/6199100X1025_1_29/)) and LAMPION<sup>®</sup> Pack interview form ([http://www.info.pmda.go.jp/go/pack/6199101X1020\\_1\\_16/](http://www.info.pmda.go.jp/go/pack/6199101X1020_1_16/)).

8 <sup>b</sup>Referred to by the European Pharmaceutical Market Research Association (<https://www.ephmra.org/classification/anatomical-classification/>).

9 **Abbreviations:** ATC, anatomical therapeutic chemical system; P-CAB, potassium-competitive acid blocker; PPI, proton pump inhibitor.

11 Table S3. Definition of diagnostic tests for *Helicobacter pylori* eradication therapy.

| Diagnostic test name             | Definition of cost calculation                                                                          |                                                                 | Code of medical service fee <sup>a</sup>         | Health insurance code <sup>a</sup> |
|----------------------------------|---------------------------------------------------------------------------------------------------------|-----------------------------------------------------------------|--------------------------------------------------|------------------------------------|
|                                  | Definition of diagnostic test                                                                           | Related-tests in a prescription                                 |                                                  |                                    |
| Rapid urease test                | Rapid urease test (qualitative)                                                                         |                                                                 | D012                                             | 160172750                          |
|                                  |                                                                                                         | Gastroduodenal endoscopy                                        | D308                                             | 160093810                          |
|                                  |                                                                                                         | Endoscopic biopsy                                               | D414                                             | 160098210                          |
|                                  |                                                                                                         | Immunological test diagnostic fee                               | D026                                             | 160062110                          |
| Direct microscopic count test    | Preparation of histopathological tissue specimen                                                        |                                                                 | N000                                             | 160060010                          |
|                                  |                                                                                                         | Gastroduodenal endoscopy                                        | D308                                             | 160093810                          |
|                                  |                                                                                                         | Endoscopic biopsy                                               | D414                                             | 160098210                          |
|                                  |                                                                                                         | Pathological diagnostic fee                                     | N007                                             | 160062310                          |
| Microbial culture test           | Identification by microbial culture (digestive tract)                                                   |                                                                 | D018                                             | 160058310                          |
|                                  |                                                                                                         | Gastroduodenal endoscopy                                        | D308                                             | 160093810                          |
|                                  |                                                                                                         | Endoscopic biopsy                                               | D414                                             | 160098210                          |
|                                  |                                                                                                         | Pathological diagnostic fee                                     | N007                                             | 160062310                          |
|                                  |                                                                                                         | Microbiological test diagnostic fee                             | D026                                             | 160062210                          |
| Antibody measurement test        | Antibody against <i>H. pylori</i> (qualitative, semi-quantitative) or Antibody against <i>H. pylori</i> |                                                                 | D012                                             | 160172450                          |
|                                  |                                                                                                         | Venous blood collection                                         | D400-00                                          | 160095710                          |
|                                  |                                                                                                         | Immunological test diagnostic fee                               | D026                                             | 160062110                          |
| <sup>13</sup> C-Urea breath test | <sup>13</sup> C-Urea breath test                                                                        |                                                                 | D023-02                                          | 160172850                          |
|                                  |                                                                                                         | Microbiological test diagnostic fee                             | D026                                             | 160062210                          |
|                                  |                                                                                                         | Diagnostic drug Pylonic® or Diagnostic drug Ubit® tablet 100 mg | ATC: T2X9 <sup>b</sup><br>ATC: T2X9 <sup>b</sup> | 610462013<br>610462047             |
| Stool antigen test               | <i>H. pylori</i> antigen (qualitative)                                                                  |                                                                 | D012                                             | 160175450                          |
|                                  |                                                                                                         | Immunological test diagnostic fee                               | D026                                             | 160062110                          |

12 **Note:** A diagnostic test was defined as a test that was included on a health insurance claim using one of the codes listed above. Diagnostic test costs were  
13 the sum of costs for defined diagnostic tests and defined related tests. <sup>a</sup>Referred to by the Medical Fee Information Service  
14 (<http://www.iryohoken.go.jp/shinryohoshu/>). <sup>b</sup>Referred to by the European Pharmaceutical Market Research Association  
15 (<https://www.ephmra.org/classification/anatomical-classification/>).

16 **Abbreviations:** ATC, anatomical therapeutic chemical system.  
17

18 **Table S4. Characteristics of patients treated with P-CAB + CAM 400 mg/day or P-CAB + CAM 800 mg/day, before and after propensity score**  
19 **matching.**

| Item                                           | Unmatched                           |                                     |                      | Matched                             |                                     |                      |
|------------------------------------------------|-------------------------------------|-------------------------------------|----------------------|-------------------------------------|-------------------------------------|----------------------|
|                                                | P-CAB +<br>CAM 400 mg<br>(n=35,625) | P-CAB +<br>CAM 800 mg<br>(n=14,771) | p-value <sup>a</sup> | P-CAB +<br>CAM 400 mg<br>(n=14,769) | P-CAB +<br>CAM 800 mg<br>(n=14,769) | p-value <sup>a</sup> |
| <b>Age, mean (years) ± SD</b>                  | 51.0±10.2                           | 50.5±10.0                           | <0.0001              | 50.5±10.0                           | 50.5±10.0                           | 0.893                |
| <b>Male (%)</b>                                | 20,377 (57.2%)                      | 9,000 (60.9%)                       | <0.0001              | 8,997 (60.9%)                       | 8,998 (60.9%)                       | 0.991                |
| <b>Indication, n (%)<sup>b</sup></b>           |                                     |                                     |                      |                                     |                                     |                      |
| <b>Gastritis</b>                               | 12,732 (35.7%)                      | 5,931 (40.2%)                       | <0.0001              | 5,927 (40.1%)                       | 5,929 (40.1%)                       | 0.981                |
| <b>Peptic ulcer</b>                            | 8,996 (25.3%)                       | 3,986 (27%)                         | <0.0001              | 3,990 (27.0%)                       | 3,986 (27.0%)                       | 0.958                |
| <b>Stomach Cancer</b>                          | 191 (0.5%)                          | 64 (0.4%)                           | 0.139                | 48 (0.3%)                           | 64 (0.4%)                           | 0.130                |
| <b>Idiopathic thrombocytopenic<br/>purpura</b> | 30 (0.1%)                           | 20 (0.1%)                           | 0.097                | 13 (0.1%)                           | 18 (0.1%)                           | 0.369                |
| <b>Gastric MALT lymphoma</b>                   | 25 (0.1%)                           | 3 (0%)                              | 0.031                | 3 (0.0%)                            | 3 (0.0%)                            | 1.000                |
| <b>GERD, n (%)</b>                             | 7,116 (20%)                         | 3,273 (22.2%)                       | <0.0001              | 3,027 (20.5%)                       | 3,273 (22.2%)                       | 0.001                |
| <b>Triple-drug blister pack, n (%)</b>         | 18,942 (53.2%)                      | 6,521 (44.1%)                       | <0.0001              | 7,981 (54.0%)                       | 6,520 (44.1%)                       | <0.0001              |
| <b>Patients in primary care, n (%)</b>         | 23,102 (64.9%)                      | 8,972 (60.8%)                       | <0.0001              | 9,661 (65.5%)                       | 8,971 (60.8%)                       | <0.0001              |

20 **Note:** <sup>a</sup>p-value P-CAB + CAM 400 mg vs. P-CAB + CAM 800 mg. <sup>b</sup>Indications, based on insurance name of disease, are totals including duplicates diagnosed  
21 up to 6 months before the first eradication treatment. Since there are possible indications other than those listed, the total will not be 100%.

22 **Abbreviations:** CAM, clarithromycin; GP, general practitioner; GERD, gastroesophageal reflux disease; JPY, Japanese yen; MALT, mucosa-associated  
23 lymphoid tissue; P-CAB, potassium-competitive acid blocker; SD, standard deviation.

25 **Table S5. Characteristics of patients treated with PPI + CAM 400 mg/day or PPI + CAM 800 mg/day, before and after propensity score matching.**

| Item                                      | Unmatched                         |                                  |                      | Matched                          |                                  |                      |
|-------------------------------------------|-----------------------------------|----------------------------------|----------------------|----------------------------------|----------------------------------|----------------------|
|                                           | PPI +<br>CAM 400 mg<br>(n=14,211) | PPI +<br>CAM 800 mg<br>(n=7,794) | p-value <sup>a</sup> | PPI +<br>CAM 400 mg<br>(n=7,794) | PPI +<br>CAM 800 mg<br>(n=7,794) | p-value <sup>a</sup> |
| Age, mean (years) ± SD                    | 51.8±10.1                         | 51.3±10.0                        | 0.0004               | 51.4±10.0                        | 51.3±10.0                        | 0.883                |
| Male, n (%)                               | 8,002 (56.3%)                     | 4,622 (59.3%)                    | <0.0001              | 4,647 (59.6%)                    | 4,622 (59.3%)                    | 0.683                |
| Indication, n (%) <sup>b</sup>            |                                   |                                  |                      |                                  |                                  |                      |
| Gastritis                                 | 4,238 (29.8%)                     | 2,485 (31.9%)                    | 0.002                | 2,484 (31.9%)                    | 2,485 (31.9%)                    | 0.986                |
| Peptic ulcer                              | 4,193 (29.5%)                     | 2,446 (31.4%)                    | 0.004                | 2,439 (31.3%)                    | 2,446 (31.4%)                    | 0.904                |
| Stomach Cancer                            | 81 (0.6%)                         | 16 (0.2%)                        | <0.0001              | 16 (0.2%)                        | 16 (0.2%)                        | 1.000                |
| Idiopathic<br>thrombocytopenic<br>purpura | 24 (0.2%)                         | 14 (0.2%)                        | 0.854                | 3 (0.0%)                         | 14 (0.2%)                        | 0.008                |
| Gastric MALT<br>lymphoma                  | 4 (0.0%)                          | 3 (0.0%)                         | 0.681                | 2 (0.0%)                         | 3 (0.0%)                         | 0.655                |
| GERD, n (%)                               | 2,980 (21.0%)                     | 1,823 (23.4%)                    | <0.0001              | 1,656 (21.2%)                    | 1,823 (23.4%)                    | 0.001                |
| Triple-drug blister pack, n<br>(%)        | 10,973 (77.2%)                    | 5,798 (74.4%)                    | <0.0001              | 5,979 (76.7%)                    | 5,798 (74.4%)                    | 0.001                |
| Patients in primary care, n<br>(%)        | 9,149 (64.9%)                     | 5,019 (64.6%)                    | 0.724                | 5,049 (65.3%)                    | 5,019 (64.6%)                    | 0.375                |

26 **Note:** <sup>a</sup>p-value PPI + CAM 400 mg vs. PPI + CAM 800 mg. <sup>b</sup>Indications, based on insurance name of disease, are totals including duplicates diagnosed up to  
27 6 months before the first eradication treatment. Since there are possible indications other than those listed, the total will not be 100%.

28 **Abbreviations:** CAM, clarithromycin; GP, general practitioner; GERD, gastroesophageal reflux disease; JPY, Japanese yen; MALT, mucosa-associated  
29 lymphoid tissue; PPI, proton pump inhibitor; SD, standard deviation.

31 **Table S6. Characteristics of patients treated with P-CAB + CAM 400 mg/day or PPI + CAM 400 mg/day, before and after propensity score matching.**

| Item                                               | Unmatched                           |                                   |                      | Matched                             |                                   |                      |
|----------------------------------------------------|-------------------------------------|-----------------------------------|----------------------|-------------------------------------|-----------------------------------|----------------------|
|                                                    | P-CAB +<br>CAM 400 mg<br>(n=35,625) | PPI +<br>CAM 400 mg<br>(n=14,211) | p-value <sup>a</sup> | P-CAB +<br>CAM 400 mg<br>(n=14,206) | PPI +<br>CAM 400 mg<br>(n=14,206) | p-value <sup>a</sup> |
| <b>Age, mean (years) ± SD</b>                      | 51±10.2                             | 51.8±10.1                         | <0.0001              | 51.8±10.1                           | 51.8±10.1                         | 0.966                |
| <b>Male (%)</b>                                    | 20,377 (57.2%)                      | 8,002 (56.3%)                     | 0.070                | 7,998 (56.3%)                       | 8,000 (56.3%)                     | 0.981                |
| <b>Indication, n (%)<sup>b</sup></b>               |                                     |                                   |                      |                                     |                                   |                      |
| <b>Gastritis</b>                                   | 12,732 (35.7%)                      | 4,238 (29.8%)                     | <0.0001              | 4,259 (30%)                         | 4,238 (29.8%)                     | 0.786                |
| <b>Peptic ulcer</b>                                | 8,996 (25.3%)                       | 4,193 (29.5%)                     | <0.0001              | 4,206 (29.6%)                       | 4,193 (29.5%)                     | 0.866                |
| <b>Stomach Cancer</b>                              | 191 (0.5%)                          | 81 (0.6%)                         | 0.643                | 52 (0.4%)                           | 81 (0.6%)                         | 0.012                |
| <b>Idiopathic<br/>thrombocytopenic<br/>purpura</b> | 30 (0.1%)                           | 24 (0.2%)                         | 0.010                | 19 (0.1%)                           | 19 (0.1%)                         | 1.000                |
| <b>Gastric MALT<br/>lymphoma</b>                   | 25 (0.1%)                           | 4 (0%)                            | 0.079                | 4 (0%)                              | 4 (0%)                            | 1.000                |
| <b>GERD</b>                                        | 7,116 (20%)                         | 2,980 (21%)                       | 0.013                | 2,951 (20.8%)                       | 2,980 (21%)                       | 0.672                |
| <b>Triple-drug blister pack</b>                    | 18,942 (53.2%)                      | 10,973 (77.2%)                    | <0.0001              | 7,466 (52.6%)                       | 10,971 (77.2%)                    | <0.0001              |
| <b>Patients in primary care, n (%)</b>             | 23,102 (64.9%)                      | 9,149 (64.9%)                     | 0.921                | 9,159 (64.5%)                       | 9,147 (64.9%)                     | 0.565                |

**Note:** <sup>a</sup>p-value P-CAB CAM 400 mg vs. PPI CAM 400 mg. <sup>b</sup>Indications, based on insurance name of disease, are totals including duplicates diagnosed up to 6 months before the first eradication treatment. Since there are possible indications other than those listed, the total will not be 100%.

**Abbreviations:** CAM, clarithromycin; GP, general practitioner; GERD, gastroesophageal reflux disease; JPY, Japanese yen; MALT, mucosa-associated lymphoid tissue; P-CAB, potassium-competitive acid blocker; PPI, proton pump inhibitor; SD, standard deviation.

36 **Supplementary figures:**

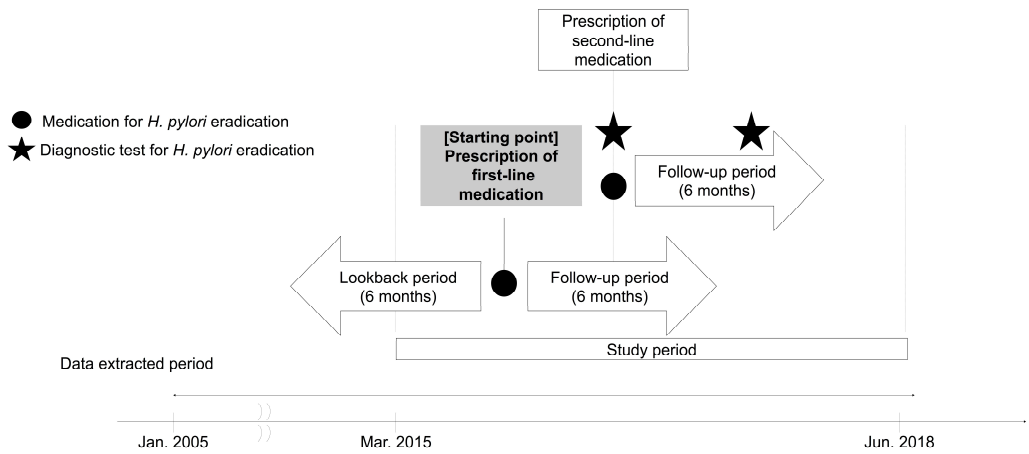

37  
38 **Figure S1. Definitions of study period and successful first-line eradication therapy.**

39 This analysis included patients who were prescribed medication for *H. pylori* first-line eradication  
40 therapy from March 2015 to June 2018. Successful first-line eradication therapy was defined as  
41 patients who completed any diagnostic tests within 6 months after a prescription for first-line  
42 eradication medication and who had not been prescribed any medications for second-line eradication  
43 therapy.

44 **Abbreviations:** ICD, International Classification of Diseases; P-CAB, potassium-competitive acid  
45 blocker; PPI, proton pump inhibitor.

46

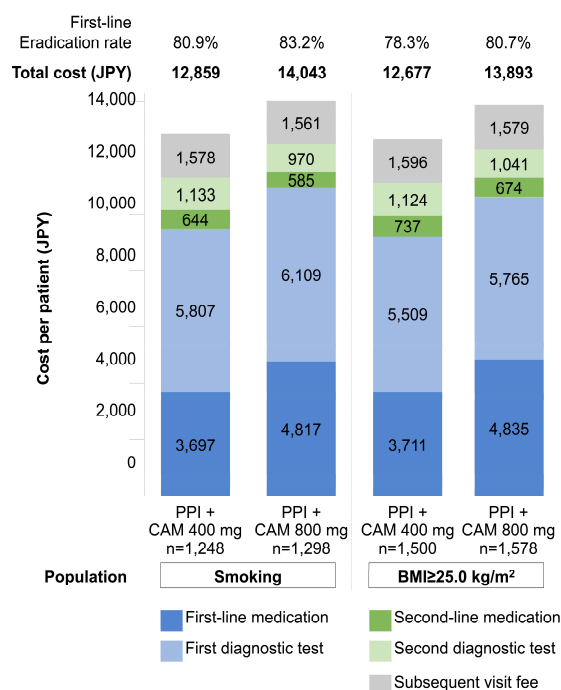

47

48 **Figure S2. Total costs for *Helicobacter pylori* eradication therapy per patient between CAM 400**  
 49 **mg/day and 800 mg/day in PPI-treated patients with smoking habit or overweight/obese.**

50 Total costs are presented as mean values per patient.

51 **Abbreviations:** BMI, body mass index; CAM, clarithromycin; JPY, Japanese yen; PPI, proton pump  
 52 inhibitor.

53

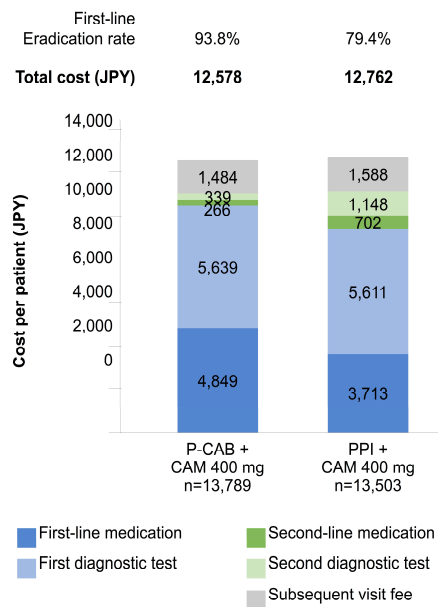

54  
55 **Figure S3. Total costs for *Helicobacter pylori* eradication therapy between the P-CAB + CAM**  
56 **400 mg/day and PPI + CAM 400 mg/day regimens.**

57 Total costs are presented as mean values per patient.

58 **Abbreviations:** CAM, clarithromycin; JPY, Japanese yen; P-CAB, potassium-competitive acid  
59 blocker; PPI, proton pump inhibitor.

60

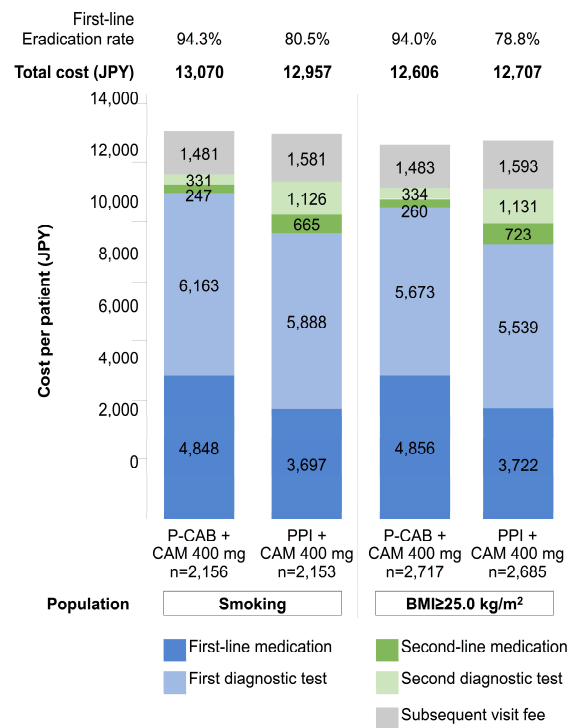

61

62 **Figure S4. Total costs for *Helicobacter pylori* eradication therapy per patient between P-CAB +**  
63 **CAM 400 mg/day and PPI + CAM 400 mg/day-treated patients with smoking habit or**  
64 **overweight/obese.**

65 Total costs are presented as mean values per patient.

66 **Abbreviations:** BMI, body mass index; CAM, clarithromycin JPY, Japanese yen; P-CAB, potassium-  
67 competitive acid blocker; PPI, proton pump inhibitor.

68
